# Supplementary material for: Spontaneous phase transition in bacterial polar fluids
Source: Research Square preprint supplement (doi:10.21203/rs.3.rs-7760051/v1), 2025-10-14
Supplement: Supplementary file 1 [file 2f00d1bfa82fd91ef57f3075.pdf]

Mov1.  $\Omega_z^{1/2} = 0.8 \text{ s}^{-1}$ ,  $H=46 \text{ }\mu\text{m}$ ,  $\rho = 9 \times 10^{10}/\text{mL}$ , focus at  $H/2$ .

Mov2.  $\Omega_z^{1/2} = 0.8 \text{ s}^{-1}$ ,  $H=108 \text{ }\mu\text{m}$ ,  $\rho = 9 \times 10^{10}/\text{mL}$ , focus at  $H/2$ .

Mov3.  $\Omega_z^{1/2} = 2 \text{ s}^{-1}$ ,  $H=46 \text{ }\mu\text{m}$ ,  $\rho = 1.3 \times 10^{11}/\text{mL}$ , focus at  $H/2$ .

Mov4.  $\Omega_z^{1/2} = 2 \text{ s}^{-1}$ ,  $H=108 \text{ }\mu\text{m}$ ,  $\rho = 1.3 \times 10^{11}/\text{mL}$ , focus at  $H/2$ .

Mov5. Inactive bacteria,  $H=100 \text{ }\mu\text{m}$ ,  $\rho = 1 \times 10^{11}/\text{mL}$ , focus at bottom. The brightness was enhanced after contact line coalescence to improve visualization.

Mov6.  $1 \text{ }\mu\text{m}$  PS particle,  $H=100 \text{ }\mu\text{m}$ , focus at bottom.
